# Supplementary material
Source: ML conference proceedings conference paper supplement (https://openaccess.thecvf.com/content/ICCV2025/html/Li_Enhancing_Partially_Relevant_ICCV_2025_paper.html)
Supplement: Supplementary file 1 [file Li_Enhancing_Partially_Relevant_ICCV_2025_supplemental.pdf]

# Enhancing Partially Relevant Video Retrieval with Hyperbolic Learning

## Supplementary Material

### A. Appendix

#### A.1. Derivation of $L_{pop}$

In this section, we formally derive the components of the partial order preservation loss employed in our approach.

**Half-Aperture** We begin with the definition of the half-aperture for the Poincaré ball, as introduced by Ganea et al. [3]. Given a point  $\mathbf{x}_{\mathcal{P}}$  on the Poincaré ball, the cone half-aperture is formulated as:

$$\text{HA}_{\mathcal{P}}(\mathbf{x}_{\mathcal{P}}) = \sin^{-1} \left( c \frac{1 - \|\mathbf{x}_{\mathcal{P}}\|^2}{\|\mathbf{x}_{\mathcal{P}}\|} \right). \quad (22)$$

Since the Poincaré ball model and the Lorentz hyperboloid model are isometric, any point  $\mathbf{x}_{\mathcal{P}}$  in the Poincaré ball can be mapped to a corresponding point  $\mathbf{x}_{\mathcal{L}}$  in the hyperboloid model via the following differentiable transformation:

$$\mathbf{x}_{\mathcal{L}} = \frac{2\mathbf{x}_{\mathcal{P}}}{1 - \|\mathbf{x}_{\mathcal{P}}\|^2}. \quad (23)$$

To ensure model invariance, the half-aperture should remain unchanged across hyperbolic representations, i.e.,  $\text{HA}_{\mathcal{L}}(\mathbf{x}_{\mathcal{L}}) = \text{HA}_{\mathcal{P}}(\mathbf{x}_{\mathcal{P}})$ . Substituting Eq. (23) into Eq. (22), we derive:

$$\text{HA}_{\mathcal{L}}(\mathbf{x}_{\mathcal{L}}) = \sin^{-1} \left( \frac{2c}{\|\mathbf{x}_{\mathcal{L}}\|} \right). \quad (24)$$

**Exterior Angle** Consider three points: the origin  $\mathbf{o}$ , the video embedding  $\mathbf{v}$ , and the text embedding  $\mathbf{t}$ . These points form a hyperbolic triangle whose sides are defined by the geodesic distances  $x = d_{\mathcal{L}}^2(\mathbf{o}, \mathbf{t})$ ,  $y = d_{\mathcal{L}}^2(\mathbf{o}, \mathbf{v})$ , and  $z = d_{\mathcal{L}}^2(\mathbf{v}, \mathbf{t})$ . The hyperbolic law of cosines provides a means to compute the angles of this triangle. The exterior angle is given by:

$$\begin{aligned} \text{EA}(\mathbf{v}, \mathbf{t}) &= \pi - \angle \mathbf{o} \mathbf{v} \mathbf{t} \\ &= \pi - \cos^{-1} \left[ \frac{\cosh(z) \cosh(y) - \cosh(x)}{\sinh(z) \sinh(y)} \right]. \end{aligned} \quad (25)$$

We define  $g(s) = \cosh(s)$  and employ the hyperbolic identity  $\sinh(s) = \sqrt{\cosh^2(s) - 1}$ :

$$\text{EA}(\mathbf{v}, \mathbf{t}) = \cos^{-1} \left[ \frac{g(x) - g(z)g(y)}{\sqrt{g(z)^2 - 1} \sqrt{g(y)^2 - 1}} \right]. \quad (26)$$

We now compute  $g(x)$ ,  $g(y)$ , and  $g(z)$ . Given that  $g(z) = \cosh(d_{\mathcal{L}}^2(\mathbf{v}, \mathbf{t}))$  and utilizing the definition  $d_{\mathcal{L}}^2(\mathbf{v}, \mathbf{t}) = \cosh^{-1}(-\langle \mathbf{v}, \mathbf{t} \rangle_{\mathcal{L}})$ , we obtain:

$$\begin{aligned} g(z) &= \cosh(d_{\mathcal{L}}^2(\mathbf{v}, \mathbf{t})) \\ &= \cosh(\cosh^{-1}(-\langle \mathbf{v}, \mathbf{t} \rangle_{\mathcal{L}})) \\ &= -\langle \mathbf{v}, \mathbf{t} \rangle_{\mathcal{L}}. \end{aligned} \quad (27)$$

Similarly, we derive  $g(x) = -\langle \mathbf{o}, \mathbf{t} \rangle_{\mathcal{L}}$  and  $g(y) = -\langle \mathbf{o}, \mathbf{v} \rangle_{\mathcal{L}}$ . The Lorentzian inner product with the origin  $\mathbf{o}$  simplifies as follows:

$$\langle \mathbf{o}, \mathbf{v} \rangle_{\mathcal{L}} = -v_0, \quad \text{and} \quad \langle \mathbf{o}, \mathbf{t} \rangle_{\mathcal{L}} = -t_0. \quad (28)$$

Thus, we obtain  $g(x) = t_0$  and  $g(y) = v_0$ . Substituting these values into Eq. (26), we derive the refined expression:

$$\text{EA}(\mathbf{v}, \mathbf{t}) = \cos^{-1} \left( \frac{t_0 + v_0 \langle \mathbf{v}, \mathbf{t} \rangle_{\mathcal{L}}}{\sqrt{v_0^2 - 1} \sqrt{(\langle \mathbf{v}, \mathbf{t} \rangle_{\mathcal{L}})^2 - 1}} \right).$$

Finally, utilizing the relation between  $x_0$  and  $v_s$ , we simplify the denominator to obtain the final expression for the exterior angle:

$$\text{EA}(\mathbf{v}, \mathbf{t}) = \cos^{-1} \left( \frac{t_0 + v_0 \langle \mathbf{v}, \mathbf{t} \rangle_{\mathcal{L}}}{\|\mathbf{v}_s\| \sqrt{(\langle \mathbf{v}, \mathbf{t} \rangle_{\mathcal{L}})^2 - 1}} \right).$$

#### A.2. Training Objectives

Following existing works [2, 8], we adopt triplet loss [1, 5]  $L^{trip}$  and InfoNCE loss [4, 6, 9, 10]  $L^{nce}$ , query diverse loss [7, 8]  $L_{div}$ . A text-video pair is considered positive if the video contains a moment relevant to the text; otherwise, it is regarded as negative. Given a positive text-video pair  $(\mathcal{T}, \mathcal{V})$ , the triplet ranking loss over the mini-batch  $\mathcal{B}$  is formulated as:

$$\begin{aligned} L^{trip} &= \frac{1}{N} \sum_{(\mathcal{T}, \mathcal{V}) \in \mathcal{B}} \{ \max(0, m + S(\mathcal{T}^-, \mathcal{V}) - S(\mathcal{T}, \mathcal{V})) \\ &\quad + \max(0, m + S(\mathcal{T}, \mathcal{V}^-) - S(\mathcal{T}, \mathcal{V})) \}, \end{aligned} \quad (29)$$

where  $m$  is a margin constant.  $\mathcal{T}^-$  and  $\mathcal{V}^-$  indicate a negative text for  $\mathcal{V}$  and a negative video for  $\mathcal{T}$ , respectively. The similarity score  $S(\cdot, \cdot)$  is obtained by Equation (9).

The infoNCE loss is computed as:

$$\begin{aligned} L^{nce} &= -\frac{1}{N} \sum_{(\mathcal{T}, \mathcal{V}) \in \mathcal{B}} \{ \log \left( \frac{S(\mathcal{T}, \mathcal{V})}{S(\mathcal{T}, \mathcal{V}) + \sum_{\mathcal{T}_i^- \in \mathcal{N}_{\mathcal{T}}} S(\mathcal{T}_i^-, \mathcal{V})} \right) \\ &\quad + \log \left( \frac{S(\mathcal{T}, \mathcal{V})}{S(\mathcal{T}, \mathcal{V}) + \sum_{\mathcal{V}_i^- \in \mathcal{N}_{\mathcal{V}}} S(\mathcal{T}, \mathcal{V}_i^-)} \right) \}, \end{aligned} \quad (30)$$

where  $\mathcal{N}_{\mathcal{T}}$  and  $\mathcal{N}_{\mathcal{V}}$  represent the negative texts and videos of  $\mathcal{V}$  and  $\mathcal{T}$  within the mini-batch  $\mathcal{B}$ , respectively.

Finally,  $L_{sim}$  is defined as:

$$L_{sim} = L_{clip}^{trip} + L_{frame}^{trip} + \lambda_c L_{clip}^{nce} + \lambda_f L_{frame}^{nce}, \quad (31)$$

| Name               | Configuration                                         |
|--------------------|-------------------------------------------------------|
| CPU                | Intel® Xeon® Platinum 8269CY CPU @ 2.50GHz (26 cores) |
| GPU                | A single NVIDIA GeForce GTX 3080 Ti (12GB)            |
| RAM                | 64GB                                                  |
| OS                 | Ubuntu 20.04 LTS                                      |
| CUDA Version       | 11.7                                                  |
| GPU Driver Version | 535.183.01                                            |
| Language           | Python 3.11.8                                         |
| Dependencies       | torch 2.0.1<br>torchvision 0.15.2<br>numpy 1.26.4     |

Table 3. Computing infrastructure for our experiments.

| Params        | ActivityNet Captions | TVR  | Charades-STA |
|---------------|----------------------|------|--------------|
| learning rate | 2.5e-4               | 3e-4 | 2e-4         |
| $\alpha_f$    | 0.3                  | 0.3  | 0.3          |
| $\alpha_c$    | 0.7                  | 0.7  | 0.7          |
| $\alpha$      | 32                   | 32   | 32           |
| $\delta$      | 0.2                  | 0.15 | 0.2          |
| $m$           | 0.2                  | 0.1  | 0.2          |
| $\tau$        | 6e-1                 | 9e-2 | 6e-1         |
| $\lambda_c$   | 2e-2                 | 5e-2 | 2e-2         |
| $\lambda_f$   | 4e-2                 | 4e-2 | 4e-2         |
| $\lambda_1$   | 3e-3                 | 8e-5 | 3e-3         |
| $\lambda_2$   | 1e-3                 | 1e-3 | 1e-3         |

Table 4. Hyper-parameter settings.

where *frame* and *clip* mark the objectives for the gaze frame-level branch and the glance clip-level branch, respectively.  $\lambda_c$  and  $\lambda_f$  are hyper-parameters to balance the contributions of InfoNCE objectives.

Given a collection of text queries  $\mathcal{T}$  in the mini-batch  $\mathcal{B}$ , the query diverse loss is defined as:

$$L_{div} = \frac{1}{N} \sum_{q_i, q_j \in \mathcal{T}} \mathbb{1}_{q_i, q_j} \log(1 + e^{\alpha(\cos(q_i, q_j) + \delta)}) \quad (32)$$

where  $\delta > 0$  denotes the margin,  $\alpha > 0$  is a scaling factor, and  $\mathbb{1}_{q_i, q_j} \in \{0, 1\}$  represents an indicator function,  $\mathbb{1}_{q_i, q_j} = 1$  when  $q_i$  and  $q_j$  correspond to the same video.

## B. Experiments

### B.1. Details of Experimental Setup

**Details of Training Configurations** The computing infrastructure is in Table 3. All random seeds are set to 0.

**Hyper-parameter** Notably, we directly inherit most hyper-parameter settings from GMMFormer. In detail, we use  $M_c = 32$  for downsampling and set the maximum frame number  $M_f = 128$ . If the number of frames exceeds  $M_f$ , we uniformly downsample it to  $M_f$ . For sentences, we set the maximum length of query words to  $N_q = 64$  for ActivityNet Captions and  $N_q = 30$  for TVR and Charades-STA. Any words beyond the maximum length will be discarded. The Lorentz latent dimension  $n = 127$ . You can find other detailed hyper-parameter settings in Tab. 4.

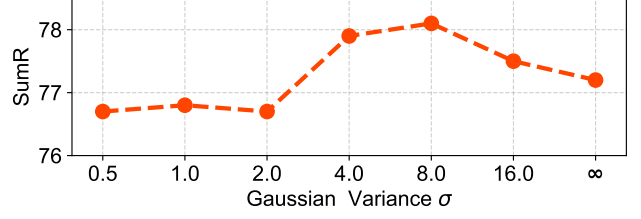

Figure 6. The impact of the Gaussian variance  $\sigma$  on Charades-STA.

### B.2. Additional Results on Model Analyses

**Impact of the Gaussian Variance  $\sigma$**  We investigate the impact of the Gaussian variance  $\sigma$  on experimental results by employing a uniform  $\sigma$  across all Gaussian attention blocks. As illustrated in Fig. 6, larger  $\sigma$  generally leads to superior performance due to its broader receptive field, which enables better modeling of temporal dependencies within videos. However, excessively large  $\sigma$  results in overly dispersed attention, weakening the enhancement of semantic information from adjacent frames or clips, thereby leading to suboptimal performance. In contrast, HLFormer employs multiple  $\sigma$  values to achieve multi-scale flexible of video semantics, not only attaining improved performance but also mitigating the need for extensive hyper-parameter tuning.

## References

- [1] Jianfeng Dong, Xirong Li, Chaoxi Xu, Xun Yang, Gang Yang, Xun Wang, and Meng Wang. Dual encoding for video retrieval by text. *IEEE Transactions on Pattern Analysis and Machine Intelligence*, 44(8):4065–4080, 2021. 1
- [2] Jianfeng Dong, Xianke Chen, Minsong Zhang, Xun Yang, Shujie Chen, Xirong Li, and Xun Wang. Partially relevant video retrieval. In *Proceedings of the 30th ACM International Conference on Multimedia*, pages 246–257, 2022. 1
- [3] Octavian Ganea, Gary Becigneul, and Thomas Hofmann. Hyperbolic entailment cones for learning hierarchical embeddings. In *Proceedings of the 35th International Conference on Machine Learning*, pages 1646–1655. PMLR, 2018. 1
- [4] Guanghao Meng, Sunan He, Jinpeng Wang, Tao Dai, Letian Zhang, Jieming Zhu, Qing Li, Gang Wang, Rui Zhang, and Yong Jiang. Evidclip: Improving vision-language retrieval with entity visual descriptions from large language models. In *Proceedings of the AAAI Conference on Artificial Intelligence*, pages 6126–6134, 2025. 1
- [5] Haomiao Tang, Jinpeng Wang, Yuang Peng, GuangHao Meng, Ruisheng Luo, Bin Chen, Long Chen, Yaowei Wang, and Shu-Tao Xia. Modeling uncertainty in composed image retrieval via probabilistic embeddings. In *Proceedings of the 63rd Annual Meeting of the Association for Computational Linguistics (Volume 1: Long Papers)*, pages 1210–1222, 2025. 1
- [6] Yuanmin Tang, Jing Yu, Keke Gai, Jiamin Zhuang, Gang Xiong, Gaopeng Gou, and Qi Wu. Missing target-relevant information prediction with world model for accurate zero-shot composed image retrieval. In *Proceedings of the Computer*

*Vision and Pattern Recognition Conference*, pages 24785–24795, 2025. [1](#)

- [7] Yuting Wang, Jinpeng Wang, Bin Chen, Tao Dai, Ruisheng Luo, and Shu-Tao Xia. Gmmformer v2: An uncertainty-aware framework for partially relevant video retrieval, 2024. [1](#)
- [8] Yuting Wang, Jinpeng Wang, Bin Chen, Ziyun Zeng, and Shu-Tao Xia. Gmmformer: Gaussian-mixture-model based transformer for efficient partially relevant video retrieval. In *Proceedings of the AAAI Conference on Artificial Intelligence*, 2024. [1](#)
- [9] Hao Zhang, Aixin Sun, Wei Jing, Guoshun Nan, Liangli Zhen, Joey Tianyi Zhou, and Rick Siow Mong Goh. Video corpus moment retrieval with contrastive learning. In *Proceedings of the 44th International ACM SIGIR Conference on Research and Development in Information Retrieval*, pages 685–695, 2021. [1](#)
- [10] Minyi Zhao, Jinpeng Wang, Dongliang Liao, Yiru Wang, Huanzhong Duan, and Shuigeng Zhou. Keyword-based diverse image retrieval by semantics-aware contrastive learning and transformer. In *Proceedings of the 46th International ACM SIGIR Conference on Research and Development in Information Retrieval*, pages 1262–1272, 2023. [1](#)
